# Supplementary material
Source: publisher site journal article supplement (https://neobiota.pensoft.net/article/8884/download/suppl/31/)
Supplement: Supplementary file 1

Supplementary figures and table

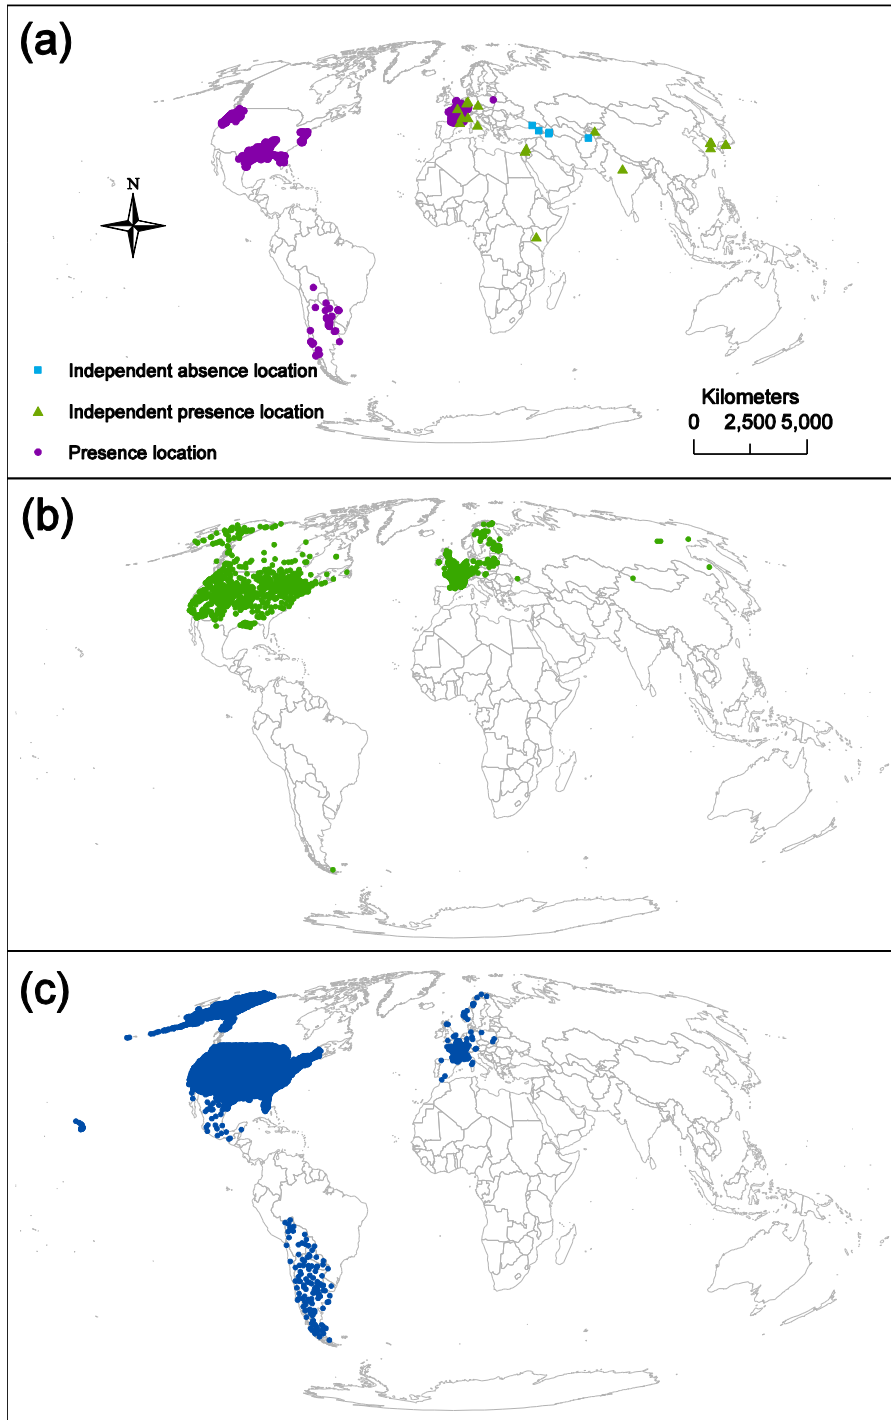

Supplementary figure 1. Coypu (*Myocastor coypus* [Molina, 1782]) model training and test data including (a) occurrence and independent data, (b) target background data consisting of GBIF records of muskrat and (c) 10,000 background locations randomly generated within countries from which coypu occurrence data records occur. Map is in Mollweide projection.

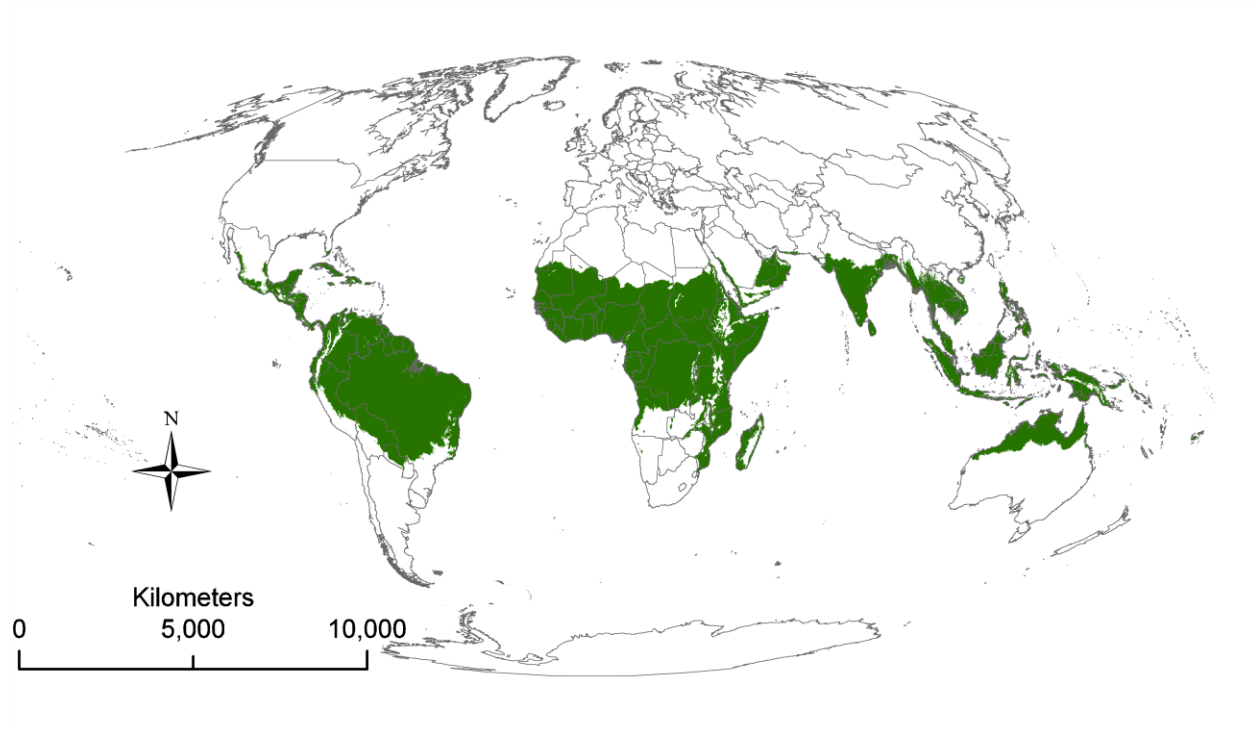

Supplementary figure 2. Global distribution of tropical environments, defined using WorldClim climate data and the Koppen climate criteria for tropical climatic designation (each months average temperature  $\geq 18$  C; Peel et al. 2007).

Supplementary table 1. Global circulation model climate data used for forecasts of *Myocastor coypus* [Molina, 1782] distributions. Data were downloaded from the "Downscaled CMIP3 and CMIP5 Climate and Hydrology Projections" archive at [http://gdo-dcp.ucllnl.org/downscaled\\_cmip\\_projections/](http://gdo-dcp.ucllnl.org/downscaled_cmip_projections/).

| Model Center or Group                                                                                                             | Model Name    | rcp26 | rcp45 | rcp60 | rcp85 |
|-----------------------------------------------------------------------------------------------------------------------------------|---------------|-------|-------|-------|-------|
| Commonwealth Scientific and Industrial Research Organization (CSIRO) and Bureau of Meteorology (BOM), Australia                   | ACCESS1.0     |       | x     |       | x     |
| Beijing Climate Center, China Meteorological Administration                                                                       | BCC-CSM1.1    | x     |       | x     |       |
|                                                                                                                                   | BCC-CSM1.1(m) |       | x     |       | x     |
| Canadian Centre for Climate Modelling and Analysis                                                                                | CanESM2       | x     | x     |       | x     |
| National Center for Atmospheric Research                                                                                          | CCSM4         | x     | x     | x     | x     |
| Community Earth System Model Contributors                                                                                         | CESM1(BGC)    |       | x     |       | x     |
|                                                                                                                                   | CESM1(CAM5)   | x     | x     | x     | x     |
| Centro Euro-Mediterraneo per I Cambiamenti Climatici                                                                              | CMCC-CM       |       | x     |       | x     |
| Centre National de Recherches Météorologiques / Centre Européen de Recherche et Formation Avancée en Calcul Scientifique          | CNRM-CM5      |       | x     |       | x     |
| Commonwealth Scientific and Industrial Research Organization in collaboration with Queensland Climate Change Centre of Excellence | CSIRO-Mk3.6.0 |       | x     | x     | x     |
| LASG, Institute of Atmospheric Physics, Chinese Academy of Sciences and CESS, Tsinghua University                                 | FGOALS-g2     | x     | x     |       | x     |
| The First Institute of Oceanography, SOA, China                                                                                   | FIO-ESM       | x     | x     | x     | x     |
| NOAA Geophysical Fluid Dynamics Laboratory                                                                                        | GFDL-CM3      | x     | x     | x     | x     |
|                                                                                                                                   | GFDL-ESM2G    | x     | x     | x     | x     |
|                                                                                                                                   | GFDL-ESM2M    | x     | x     | x     | x     |
|                                                                                                                                   |               |       |       |       |       |

| <b>Model Center or Group</b>                                                                                                                                              | <b>Model Name</b> | <b>rcp26</b> | <b>rcp45</b> | <b>rcp60</b> | <b>rcp85</b> |
|---------------------------------------------------------------------------------------------------------------------------------------------------------------------------|-------------------|--------------|--------------|--------------|--------------|
| NASA Goddard Institute for Space Studies                                                                                                                                  | GISS-E2-H-CC      |              | x            |              |              |
|                                                                                                                                                                           | GISS-E2-R         | x            | x            | x            | x            |
|                                                                                                                                                                           | GISS-E2-R-CC      |              | x            |              |              |
| Met Office Hadley Centre (additional HadGEM2-ES realizations contributed by Instituto Nacional de Pesquisas Espaciais)                                                    | HadGEM2-A         | x            | x            | x            | x            |
|                                                                                                                                                                           | HadGEM2-CC        |              | x            |              | x            |
| Institute for Numerical Mathematics                                                                                                                                       | INM-CM4           |              | x            |              | x            |
| Institut Pierre-Simon Laplace                                                                                                                                             | IPSL-CM5A-LR      | x            | x            | x            | x            |
|                                                                                                                                                                           | IPSL-CM5A-MR      | x            | x            | x            | x            |
|                                                                                                                                                                           | IPSL-CM5B-LR      |              | x            |              | x            |
| Atmosphere and Ocean Research Institute (The University of Tokyo), National Institute for Environmental Studies, and Japan Agency for Marine-Earth Science and Technology | MIROC5            | x            | x            | x            | x            |
| Japan Agency for Marine-Earth Science and Technology, Atmosphere and Ocean Research Institute (The University of Tokyo), and National Institute for Environmental Studies | MIROC-ESM-CHEM    | x            | x            | x            | x            |
| Max-Planck-Institut für Meteorologie (Max Planck Institute for Meteorology)                                                                                               | MPI-ESM-LR        | x            | x            |              | x            |
|                                                                                                                                                                           | MPI-ESM-MR        | x            | x            |              | x            |
| Meteorological Research Institute                                                                                                                                         | MRI-CGCM3         | x            | x            |              | x            |
| Norwegian Climate Centre                                                                                                                                                  | NorESM1-M         | x            | x            | x            | x            |
